# Supplementary material
Source: PubMed Central journal article supplement (PMC3697583)
Supplement: AEM.00469-13_zam999104493so1.pdf [file AEM.00469-13_zam999104493so1.pdf]

**Table S1. Supplementary data on solubility of salts and buffers**

| <b>Substance</b><br>(molecular<br>mass)          | <b>Solubility</b> | <b>Temp</b><br>(°C) | <b>Molarity</b> | <b>Reference</b>                                                                                                                                                                                                                                                          |
|--------------------------------------------------|-------------------|---------------------|-----------------|---------------------------------------------------------------------------------------------------------------------------------------------------------------------------------------------------------------------------------------------------------------------------|
| <b>NaCl</b><br>(58.44)                           | 358 g/L.          | 20                  | 6.13            | EC Joint Research Centre Institute for Health and Consumer Protection.<br><a href="http://esis.jrc.ec.europa.eu/">http://esis.jrc.ec.europa.eu/</a>                                                                                                                       |
| <b>KCl</b><br>(74.55)                            | 344 g/L           | 20                  | 4.61            | CRC Handbook of Chemistry and Physics 1991-92, 72 <sup>nd</sup> ed. DR Lide (ed).                                                                                                                                                                                         |
| <b>CaCl<sub>2</sub></b><br>(110.98)              | 745 g/L           | 20                  | 6.71            | CRC Handbook of Chemistry and Physics 1991-92, 72 <sup>nd</sup> ed DR Lide (ed).                                                                                                                                                                                          |
| <b>Na<sub>2</sub>SO<sub>4</sub></b><br>(142.04)  | 190g/<br>1000g    | 20                  | 1.29            | Wells, RC. 1923. Sodium sulphate: its sources and uses. Bulletin 717, United States Geological Survey Department of the Interior. Government Printing Office, Washington.                                                                                                 |
| <b>Na<sub>2</sub>HPO<sub>4</sub></b><br>(141.96) |                   | 20                  | 0.36            | By interpolation of solubility data at other temperatures (Table S2)                                                                                                                                                                                                      |
| <b>Tris</b><br>(121.14)                          | ~500 g/L          | 25                  | 4.13            | <a href="http://en.wikipedia.org/wiki/Tris">http://en.wikipedia.org/wiki/Tris</a>                                                                                                                                                                                         |
| <b>HEPES</b><br>(238.3)                          |                   | 0                   | 2.25            | E. Good E, Winget GD, Winter W, Connolly TN, Izawa S, Singh RMM. 1966. Hydrogen Ion Buffers for Biological Research. <i>Biochemistry</i> <b>5</b> : 467–477.<br>doi:10.1021/bi00866a011. PMID 5942950.                                                                    |
| <b>MOPS</b><br>(209.3)                           | 980 g/L           | 20                  | 4.7             | <a href="http://www.biospectra.us/p-14-mops-free-acid.aspx">http://www.biospectra.us/p-14-mops-free-acid.aspx</a>                                                                                                                                                         |
| <b>Dimethyl<br/>glutarate</b><br>(160.2)         | 43g/L             | 20                  | 0.27            | U.S. Environmental Protection Agency. Supporting Documents for Risk-Based Prioritization. 3/18/2008.<br><a href="http://www.epa.gov/hpvis/rbp/Dibasic%20esters.Web.SupportDocs.031808.pdf">http://www.epa.gov/hpvis/rbp/Dibasic%20esters.Web.SupportDocs.031808.pdf</a> . |

**Table S2 Solubility of disodium phosphate at different temperatures\***

| <b>Temp (C)</b> | <b>Solubility (M)</b> |
|-----------------|-----------------------|
| 0               | 0.12                  |
| 17              | 0.31                  |
| 20              | 0.54                  |
| 25              | 0.85                  |
| 25              | 0.44                  |
| 34              | 2.44                  |
| 40              | 3.88                  |
| 50              | 5.62                  |
| 80              | 6.57                  |

\* CRC Handbook of Chemistry and Physics 1991-92. 72<sup>nd</sup> ed. DR Lide (ed).
